# Supplementary material
Source: PubMed Central journal article supplement (PMC7736290)

## SUPPLEMENTAL MATERIAL

### SUPPLEMENTAL FIGURE AND TABLE LEGENDS

#### Supplemental Figure I: Generation of a *Brd4* conditional allele (*Brd4<sup>flox</sup>*).

(A) Targeting strategy to flank *Brd4* exon 3 (containing the canonical translation start site) with loxP sites. (B-C) Southern blotting using both 5' (B; wild type band 17.6Kb, knock-in band 6.4Kb) and 3' (C; wild type band 12.4Kb, knock-in band 7.2Kb) probes confirms appropriate targeting of mouse embryonic stem cells (images from two representative clones displayed). (D) Representative image of PCR genotyping assay used for *Brd4<sup>flox</sup>* allele that resolves an 82 bp difference (representing the residual FRT scar and 5' loxP site) between the wild type and knock-in allele.

#### Supplemental Figure II: Immunohistochemical analysis of BRD4 in *Brd4*-KO and control hearts.

(A-F) Sections stained with DAPI (blue), TNNT2 (green), and BRD4 (red) in vehicle (VEH; A-C) or tamoxifen treated (TAM; D-F) *Myh6-MCM; Brd4<sup>flox/flox</sup>* mice at 10-weeks of age. (G) Quantification of percentage of TNNT2+ cells with BRD4+ nuclei. Mean  $\pm$  1 SD shown, n=4 sections quantified. \*\*\*\* represents  $p < 0.0001$ . Scale bars = 20  $\mu$ m.

#### Supplemental Figure III: Cleaved caspase 3 staining in *Brd4*-KO and control hearts.

(A,B) Sections from 10-week old *Myh6-MCM; Brd4<sup>flox/flox</sup>* mice treated with vehicle (VEH; A) or tamoxifen (TAM; B) stained with cleaved caspase 3 (CC3; green) and TNNT2 (orange). Mean  $\pm$  1 SD shown, n=3 sections quantified. Scale bars = 100  $\mu$ m. (C) Quantification of CC3 positive nuclei in TNNT2 positive cells in sections from 10-week old *Myh6-MCM; Brd4<sup>flox/flox</sup>* mice treated with vehicle (VEH; A) or tamoxifen (TAM; B). n=3. Student's t-test was performed to assess significance.

#### Supplemental Figure IV: A 5-day regimen of 50 $\mu$ g/g/day tamoxifen is not sufficient to effectively delete BRD4 in *Myh6-MCM; Brd4<sup>flox/flox</sup>* cardiomyocytes.

(A) Immunoblot of isolated *Myh6-MCM* and *Myh6-MCM; Brd4<sup>flox/flox</sup>* cardiomyocyte lysates from mice treated with 50  $\mu$ g/g/day tamoxifen (TAM) for 5 days using BRD4 or vinculin

(loading control) antibodies. **(B)** Ejection fraction and **(C)** left ventricular end systolic volume (LVESV) of indicated mice treated with 50 µg/g/day tamoxifen (TAM) or vehicle (VEH) at indicated days after injection. Individual points and mean ± SD shown. Two-way ANOVA analysis was used to assess significance.

**Supplemental Figure V: Gene expression changes following tamoxifen-mediated Cre nuclear localization in Cre-control adult cardiac myocytes.**

**(A)** Table indicating naming convention and genotypes of various samples used in this study. **(B)** PCA plot of individual replicates of each genotype used in RNA-seq analyses. **(C-D)** Volcano plots of differential gene expression in Cre-control vs. Control at day 2 (C) and day 5 (D) with associated enriched terms from gene ontology analysis. Genes are assigned with specific colors following DE analysis: grey (not significant), green (Log2 FC<-1 or >+1), blue (adj. p<0.05) or red (Log2 FC<-1 or >+1 and adj. p<0.05).

**Supplemental Figure VI: Electron micrographs of mitochondria in *Brd4*-KO and control hearts.**

**(A, B)** Electron micrographs of cardiac tissue from 10-week old *Myh6-MCM; Brd4<sup>flox/flox</sup>* mice treated with vehicle (VEH; A) or tamoxifen (TAM; B) highlighting the loss of normal mitochondrial morphology. Scale bars = 100 nm.

**Supplemental Figure VII: Immunohistochemical analysis of BRD4 in *Tnnt2-Cre; Brd4<sup>flox/flox</sup>* and control embryonic hearts.**

**(A-F)** Immunohistochemical analysis of cross sections from *Brd4<sup>flox/flox</sup>, Tnnt2-Cre; Brd4<sup>flox/+</sup>*, and *Tnnt2-Cre; Brd4<sup>flox/flox</sup>* embryonic hearts stained with DAPI (blue), TNNT2 (green), and BRD4 (red).

**Supplemental Figure VIII: Assessment of H3K27Ac/BRD4/GATA4 enriched regions in proximity to dysregulated genes following BRD4 CM-deletion.**

**(A-C)** Heatmaps showing enrichment of H3K27Ac, BRD4, and GATA4 occupancy from adult mouse hearts under basal homeostatic conditions. Unbiased K-means clustering identified H3K27Ac positive regions with highest density of BRD4 (n=18,348; B) and

GATA4 (n=24,608; C) occupancy. **(D)** Venn diagram depicting the regions that are enriched with: H3K27Ac-BRD4 (left), H3K27Ac-BRD4-GATA4 (center) and H3K27Ac-GATA4 (right). **(E)** Percentage of DE transcripts at Day 2 and Day 5 that have a H3K27Ac-BRD4-GATA4 enriched region within 1 kb to 25 kb from their TSS.

**Supplemental Excel Tables I-V:**

RNA-seq data at Day 2 or Day 5 in *Myh6-MCM; Brd4<sup>flox/flox</sup>* animals treated with tamoxifen (*Brd4*-KO) or vehicle (control) and RNA-seq data at Day 2 or Day 5 of Cre-control (*Myh6-MCM*) versus Control. RNA-seq data at E14.0 in *Tnnt2-Cre; Brd4<sup>flox/flox</sup>* animals versus *Tnnt2-Cre; Brd4<sup>flox/+</sup>*.

# Supplemental Figure I

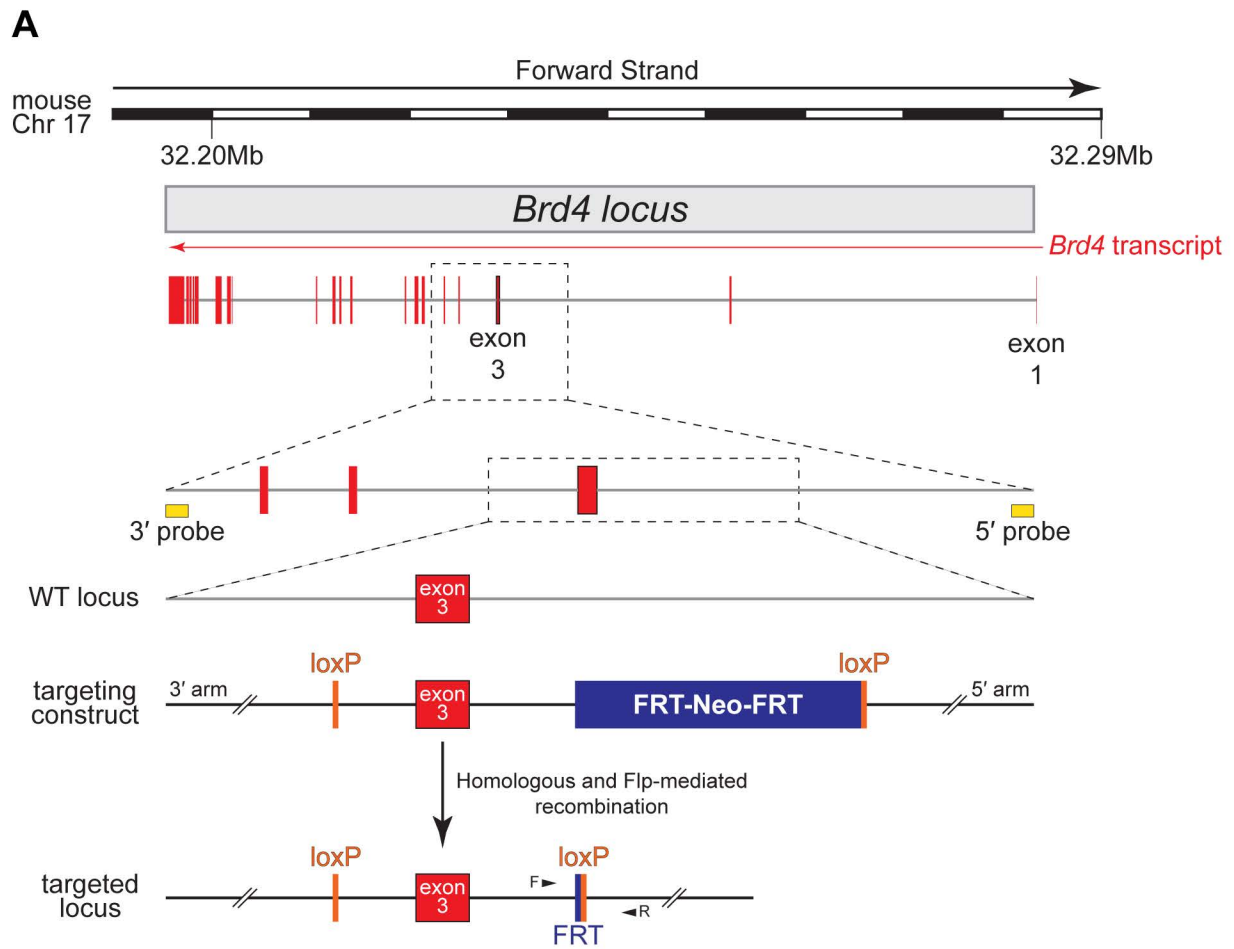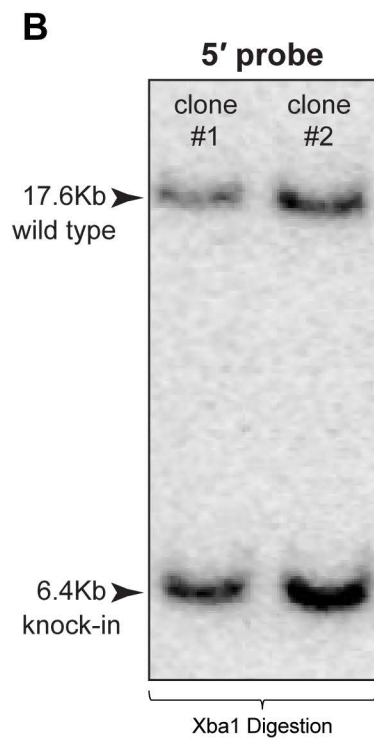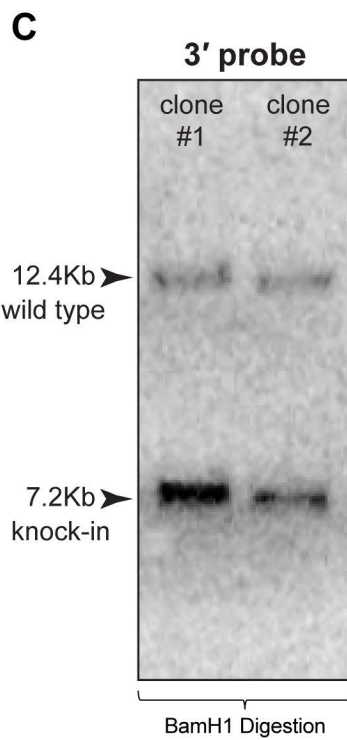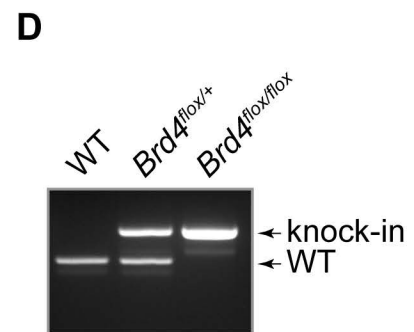

*Myh6-MCM; Brd4<sup>flox/flox</sup>*

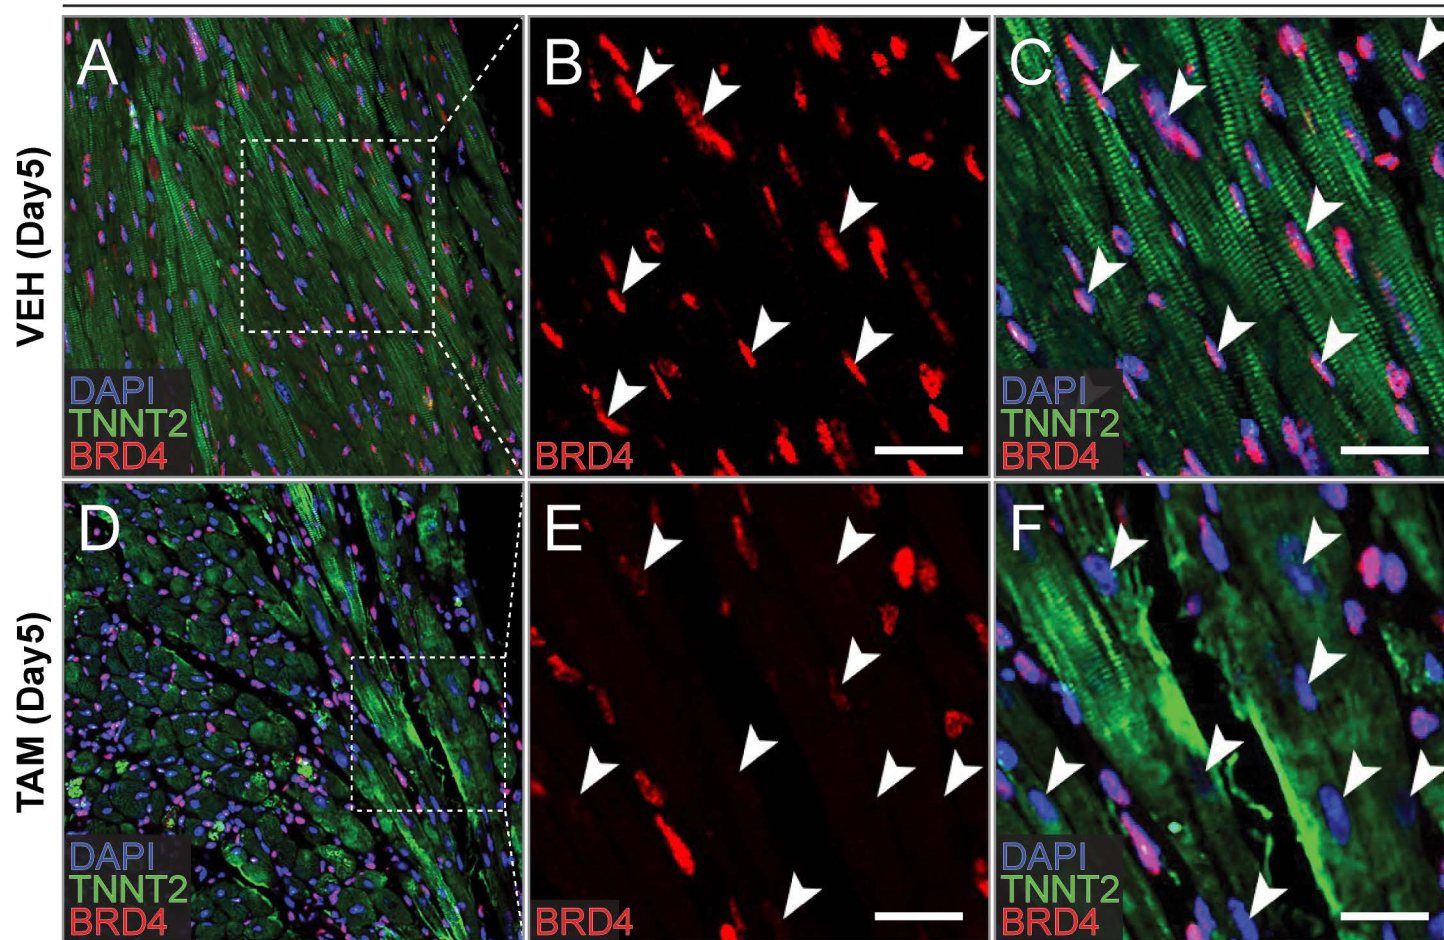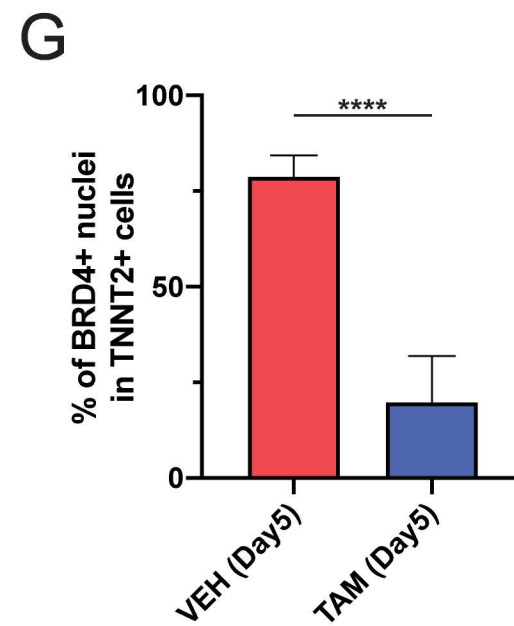

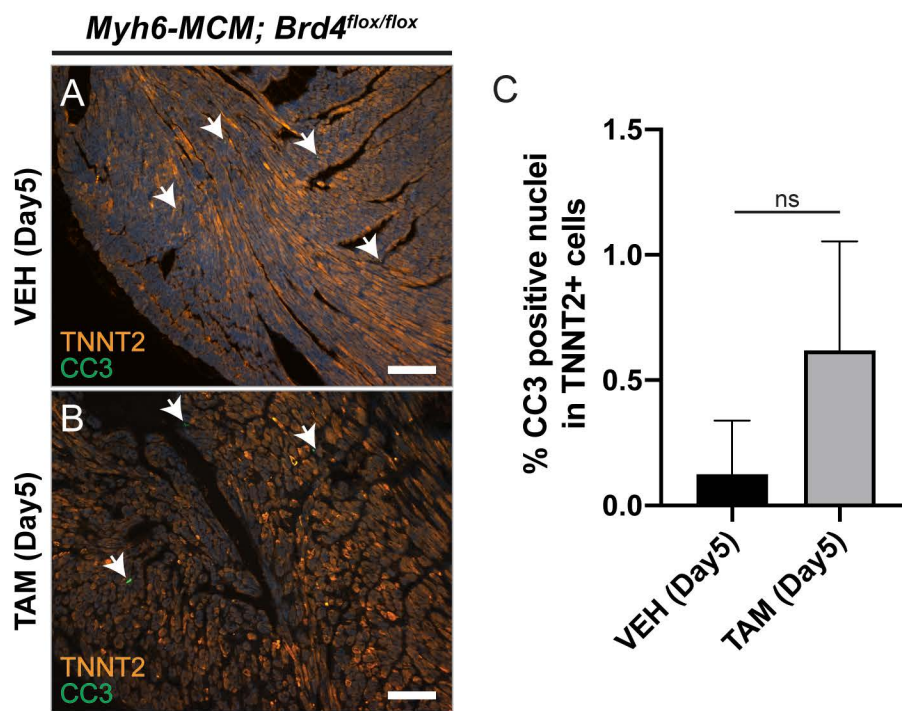

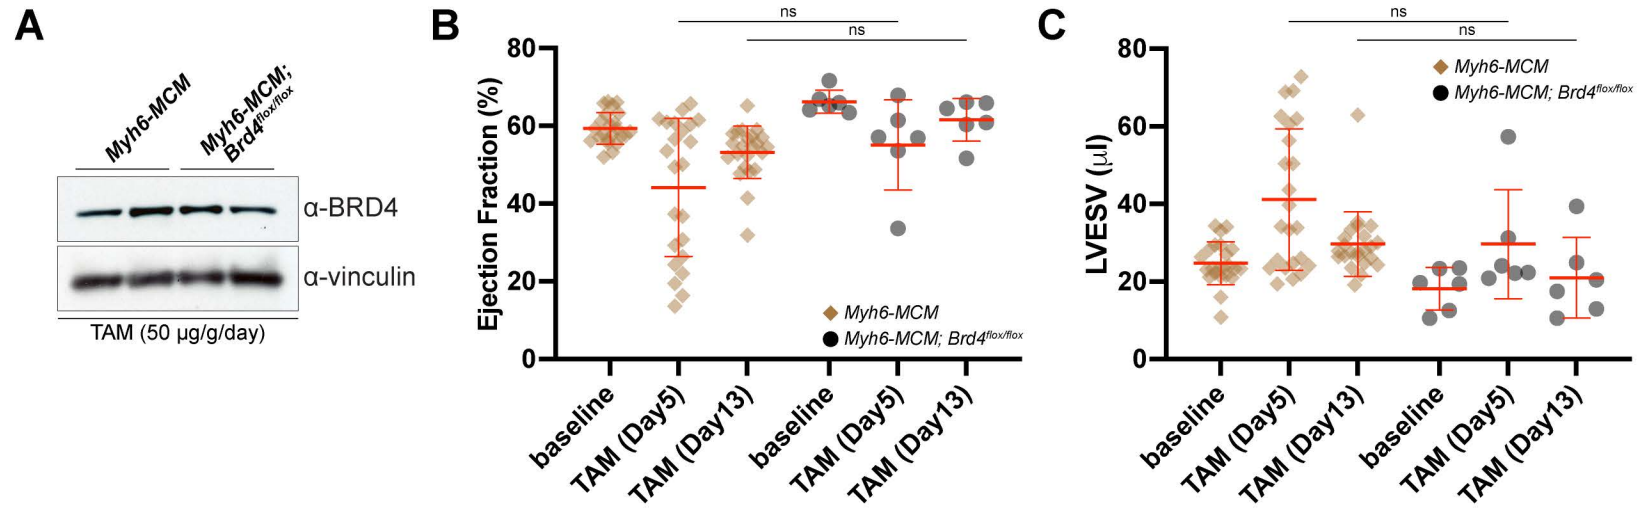



**A**

### Mouse/Sample nomenclature for RNA/ATAC sequencing

| Sample name     | Genotype                                  | Treatment |
|-----------------|-------------------------------------------|-----------|
| Cre-control     | <i>Myh6-MCM</i>                           | Tamoxifen |
| Control         | <i>Myh6-MCM; Brd4<sup>flox/flox</sup></i> | Vehicle   |
| <i>Brd4</i> -KO | <i>Myh6-MCM; Brd4<sup>flox/flox</sup></i> | Tamoxifen |

**B**

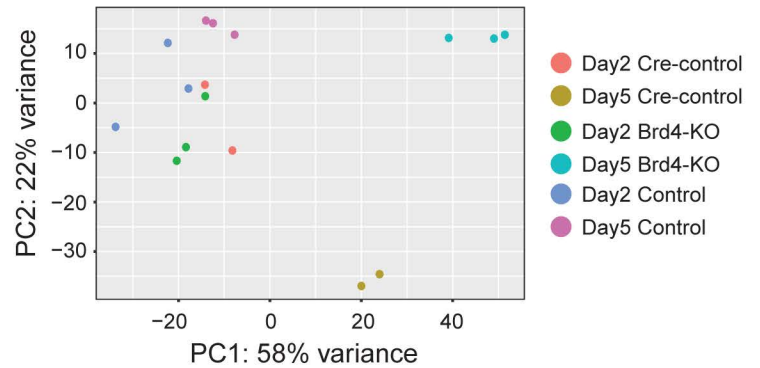

**C**

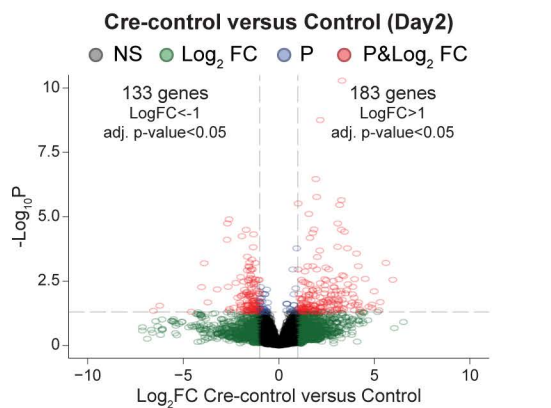

| Down-regulated Cre-control                   |             | Up-regulated Cre-control                |             |
|----------------------------------------------|-------------|-----------------------------------------|-------------|
| Biological process                           | p-val       | Biological process                      | p-val       |
| Cardiac muscle cell development              | $4.4e^{-3}$ | Pos. reg. of cellular metabolic process | $8.5e^{-4}$ |
| Reg. of cardiac muscle cell contraction      | $4.2e^{-2}$ | Negative regulation of neuron death     | NS          |
| Reg. of cardiac muscle cell action potential | $4.6e^{-2}$ | Inorganic cation transmem. transport    | NS          |

**D**

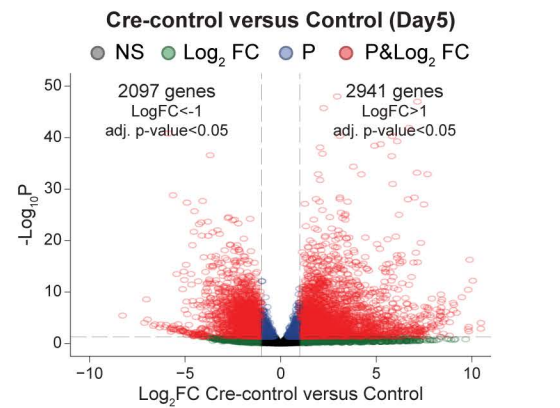

| Down-regulated Cre-control          |             | Up-regulated Cre-control |              |
|-------------------------------------|-------------|--------------------------|--------------|
| Biological process                  | p-val       | Biological process       | p-val        |
| Cellular Respiration                | $3.1e^{-3}$ | rRNA processing          | $3.3e^{-18}$ |
| Reg. of heart contraction           | $1.5e^{-2}$ | Ribosome biogenesis      | $4.5e^{-17}$ |
| Cardiac muscle cell membrane repol. | $1.6e^{-2}$ | Protein targeting to ER  | $4.5e^{-16}$ |



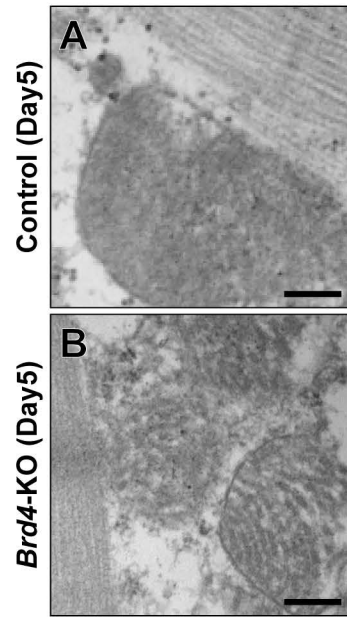

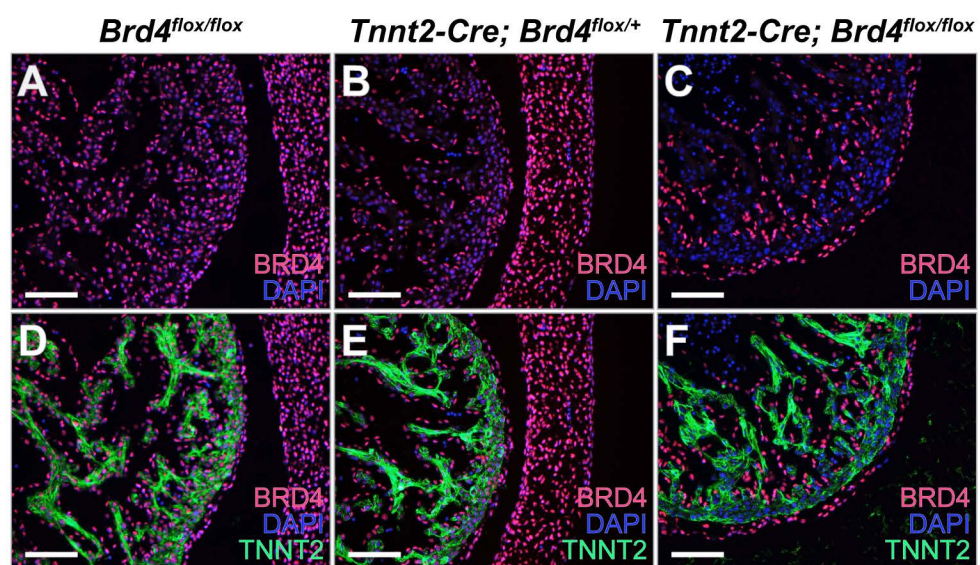

# Supplemental Figure VIII

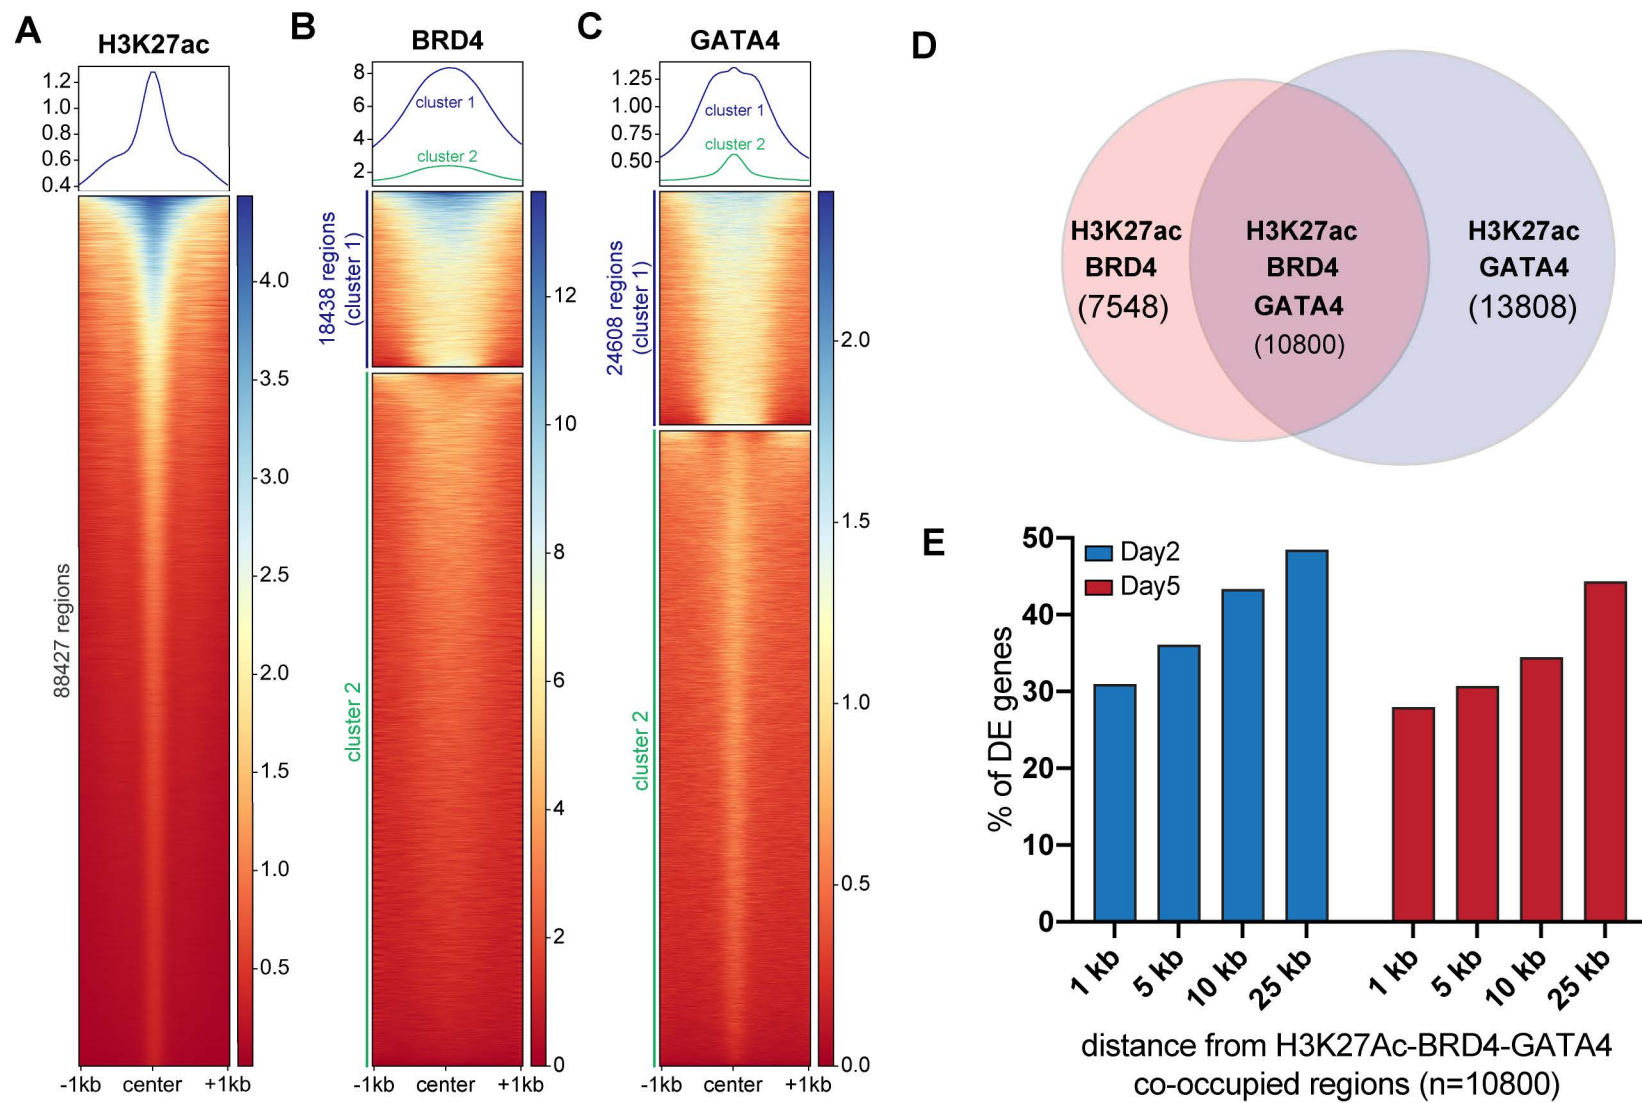

Supplement: NIHMS1643912-supplement-Compiled_Supplementary_Figures.pdf [file NIHMS1643912-supplement-Compiled_Supplementary_Figures.pdf]
